# Supplementary material for: Determination and Analysis of Thermodynamic Properties of Methyl Methylanthranilate Isomers
Source: MDPI journal article supplement (doi:10.3390/molecules28186686), 2023-09-18
Supplement: s1 [file s1]

# Supplementary Materials

## Table of Contents

|                   |                                                                                                                                                                                                                                                                                                                                                                                                                                                                        |     |
|-------------------|------------------------------------------------------------------------------------------------------------------------------------------------------------------------------------------------------------------------------------------------------------------------------------------------------------------------------------------------------------------------------------------------------------------------------------------------------------------------|-----|
| <b>TABLE S1.</b>  | Absolute standard enthalpies, $H_{298.15\text{ K}}^{\circ}$ , and entropies, $S_{298.15\text{ K}}^{\circ}$ , obtained by G3(MP2)//B3LYP composite method for MMA-3 and the corresponding derived gas-phase standard molar enthalpies, $\Delta_f H_m^{\circ}(\text{g})$ , entropies, $\Delta_f S_m^{\circ}(\text{g})$ , and Gibbs energy of formation, $\Delta_f G_m^{\circ}(\text{g})$ , at $T = 298.15\text{ K}$ , and the conformational composition, $\chi_1$ ..... | A4  |
| <b>Table S2.</b>  | Absolute standard enthalpies, $H_{298.15\text{ K}}^{\circ}$ , and entropies, $S_{298.15\text{ K}}^{\circ}$ , obtained by G3(MP2)//B3LYP composite method for MMA-4 and the corresponding derived gas-phase standard molar enthalpies, $\Delta_f H_m^{\circ}(\text{g})$ , entropies, $\Delta_f S_m^{\circ}(\text{g})$ , and Gibbs energy of formation, $\Delta_f G_m^{\circ}(\text{g})$ , at $T = 298.15\text{ K}$ , and the conformational composition, $\chi_1$ ..... | A4  |
| <b>Table S3</b>   | Absolute standard enthalpies, $H_{298.15\text{ K}}^{\circ}$ , and entropies, $S_{298.15\text{ K}}^{\circ}$ , obtained by G3(MP2)//B3LYP composite method for MMA-5 and the corresponding derived gas-phase standard molar enthalpies, $\Delta_f H_m^{\circ}(\text{g})$ , entropies, $\Delta_f S_m^{\circ}(\text{g})$ , and Gibbs energy of formation, $\Delta_f G_m^{\circ}(\text{g})$ , at $T = 298.15\text{ K}$ , and the conformational composition, $\chi_1$ ..... | A5  |
| <b>Table S4.</b>  | Absolute standard enthalpies, $H_{298.15\text{ K}}^{\circ}$ , and entropies, $S_{298.15\text{ K}}^{\circ}$ , obtained by G3(MP2)//B3LYP composite method for MMA-6 and the corresponding derived gas-phase standard molar enthalpies, $\Delta_f H_m^{\circ}(\text{g})$ , entropies, $\Delta_f S_m^{\circ}(\text{g})$ , and Gibbs energy of formation, $\Delta_f G_m^{\circ}(\text{g})$ , at $T = 298.15\text{ K}$ , and the conformational composition, $\chi_1$ ..... | A5  |
| <b>Table S5.</b>  | G3(MP2)//B3LYP enthalpies with corresponding gas-phase standard ( $p^{\circ} = 0.1\text{ MPa}$ ) molar enthalpies of formation, at $T = 298.15\text{ K}$ , for the atomic and molecular species.                                                                                                                                                                                                                                                                       | A6  |
| <b>Table S6.</b>  | Combustion results and standard ( $p^{\circ} = 0.1\text{ MPa}$ ) massic energy of combustion, at $T = 298.15\text{ K}$ , for MMA-3. ....                                                                                                                                                                                                                                                                                                                               | A8  |
| <b>Table S7.</b>  | Combustion results and standard ( $p^{\circ} = 0.1\text{ MPa}$ ) massic energy of combustion, at $T = 298.15\text{ K}$ , for MMA-5. ....                                                                                                                                                                                                                                                                                                                               | A9  |
| <b>Table S8.</b>  | Calvet microcalorimetry results for the process of vaporization of MMA-3. ....                                                                                                                                                                                                                                                                                                                                                                                         | A10 |
| <b>Table S9.</b>  | Calvet microcalorimetry results for the process of sublimation of MMA-5. ....                                                                                                                                                                                                                                                                                                                                                                                          | A11 |
| <b>Table S10.</b> | Standard ( $p^{\circ} = 0.1\text{ MPa}$ ) molar heat capacities in the gaseous phase for MMA-3 and MMA-5, obtained from statistical thermodynamics using the vibrational frequencies calculated at the B3LYP/6-31G(d) level of theory (scaled by a factor of $0.960 \pm 0.022$ ). ....                                                                                                                                                                                 | A11 |
| <b>Table S11.</b> | Knudsen mass-loss effusion results for MMA-5 at different orifices areas. ....                                                                                                                                                                                                                                                                                                                                                                                         | A12 |
| <b>Figure S1.</b> | Plots of $\ln(p/\text{Pa})$ against $1/T$ for small, medium and large orifices obtained by the mass-loss Knudsen effusion experiments for MMA-5. ....                                                                                                                                                                                                                                                                                                                  | A14 |

## Acronyms

MMA-3, methyl 3-methylantranilate  
MMA-4, methyl 4-methylantranilate  
MMA-5, methyl 5-methylantranilate  
MMA-6, methyl 6-methylantranilate

## A1. Computational Studies

Theoretical calculations of the molecular structures were performed using the Gaussian-09 software [1].

This section presents four tables, labeled from S1 to S4. These tables contain the absolute standard enthalpies,  $H_{298.15\text{ K}}^\circ$ , and entropies,  $S_{298.15\text{ K}}^\circ$ , obtained using the G3(MP2)//B3LYP [2] composite method for each of the methyl methylantranilate isomers. Additionally, the corresponding derived gas-phase standard molar enthalpies,  $\Delta_f H_m^\circ(\text{g})$ , entropies,  $\Delta_f S_m^\circ(\text{g})$ , and Gibbs energy of formation,  $\Delta_f G_m^\circ(\text{g})$ , are provided at  $T = 298.15\text{ K}$ , along with the conformational composition,  $\chi_i$ .

In tables A1 to A4:

- The derived gas-phase standard molar enthalpies of formation,  $\Delta_f H_m^\circ(\text{g})$ , were estimated from 7 reactions presented in Table 1 of manuscript.
- The absolute standard entropies,  $S_{298.15\text{ K}}^\circ$ , were obtained from B3LYP/6-31G(d) method for a frequency factor scale of 1.0029 [3];
- The gas-phase standard molar entropies of formation were calculated from  $\Delta_f S_m^\circ(\text{g}) = S_{298.15\text{ K}}^\circ(\text{conformer } i) - \sum S_{298.15\text{ K}}^\circ(\text{elements})$ , considering the standard absolute entropy elements values, at 298.15 K,  $S_{298.15\text{ K}}^\circ(\text{H}_2, \text{g}) = 130.680\text{ J}\cdot\text{K}^{-1}\cdot\text{mol}^{-1}$ ,  $S_{298.15\text{ K}}^\circ(\text{C, graphite}) = 5.740\text{ J}\cdot\text{K}^{-1}\cdot\text{mol}^{-1}$ ,  $S_{298.15\text{ K}}^\circ(\text{N}_2, \text{g}) = 191.61\text{ J}\cdot\text{K}^{-1}\cdot\text{mol}^{-1}$ , and  $S_{298.15\text{ K}}^\circ(\text{O}_2, \text{g}) = 205.147\text{ J}\cdot\text{K}^{-1}\cdot\text{mol}^{-1}$  taken from ref. [4];
- The gas-phase standard molar Gibbs energy of formation were calculated from  $\Delta_f G_m^\circ(\text{g}) = \Delta_f H_m^\circ(\text{g}) - T\Delta_f S_m^\circ(\text{g})$ ;
- The conformational composition,  $\chi_i$ , for each conformer was calculated assuming a Boltzmann distribution of the n possible equilibrium structures,  $\chi_i = e^{-[\Delta_f G_m^\circ(\text{g})/RT]} / \sum_i^n e^{-[\Delta_f G_m^\circ(\text{g})/RT]}$ .

**Table S1.** Absolute standard enthalpies,  $H_{298.15\text{ K}}^\circ$ , and entropies,  $S_{298.15\text{ K}}^\circ$ , obtained by G3(MP2)//B3LYP composite method for MMA-3 and the corresponding derived gas-phase standard molar enthalpies,  $\Delta_f H_m^\circ(\text{g})$ , entropies,  $\Delta_f S_m^\circ(\text{g})$ , and Gibbs energy of formation,  $\Delta_f G_m^\circ(\text{g})$ , at  $T = 298.15\text{ K}$ , and the conformational composition,  $\chi_i$ .

| Conformations of MMA-3 <sup>1</sup>                                                      |                                                                                          |     | $H_{298.15\text{ K}}^\circ$ <sup>2</sup><br>/ a.u. | $\Delta_f H_m^\circ(\text{g})$<br>/ kJ·mol <sup>-1</sup> | $S_{298.15\text{ K}}^\circ$<br>/ J·K <sup>-1</sup> ·mol <sup>-1</sup> | $\Delta_f S_m^\circ(\text{g})$<br>/ J·K <sup>-1</sup> ·mol <sup>-1</sup> | $\Delta_f G_m^\circ(\text{g})$<br>/ kJ·mol <sup>-1</sup> | $\chi_i$ |
|------------------------------------------------------------------------------------------|------------------------------------------------------------------------------------------|-----|----------------------------------------------------|----------------------------------------------------------|-----------------------------------------------------------------------|--------------------------------------------------------------------------|----------------------------------------------------------|----------|
| 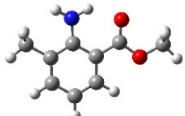<br>(1) | <br>(2) | (1) | -553.960367                                        | -321.6 ± 2.9                                             | 436.00                                                                | -635.4                                                                   | -132.2                                                   | 0.496    |
|                                                                                          |                                                                                          | (2) | -553.960366                                        | -321.6 ± 2.9                                             | 436.00                                                                | -635.4                                                                   | -132.2                                                   | 0.496    |
| <br>(3) | <br>(4) | (3) | -553.955693                                        | -309.3 ± 2.9                                             | 438.00                                                                | -633.4                                                                   | -120.5                                                   | 0.004    |
|                                                                                          |                                                                                          | (4) | -553.955693                                        | -309.3 ± 2.9                                             | 438.00                                                                | -633.4                                                                   | -120.5                                                   | 0.004    |

<sup>1</sup>Spheres color code: grey, C; red, O; blue, N; white, H.

<sup>2</sup> 1 a. u. (Hartree) corresponds to 2625.50 kJ·mol<sup>-1</sup>.

**Table S2.** Absolute standard enthalpies,  $H_{298.15\text{ K}}^\circ$ , and entropies,  $S_{298.15\text{ K}}^\circ$ , obtained by G3(MP2)//B3LYP composite method for MMA-4 and the corresponding derived gas-phase standard molar enthalpies,  $\Delta_f H_m^\circ(\text{g})$ , entropies,  $\Delta_f S_m^\circ(\text{g})$ , and Gibbs energy of formation,  $\Delta_f G_m^\circ(\text{g})$ , at  $T = 298.15\text{ K}$ , and the conformational composition,  $\chi_i$ .

| Conformations of MMA-4 <sup>1</sup>                                                        |                                                                                            |     | $H_{298.15\text{ K}}^\circ$ <sup>2</sup><br>/ a.u. | $\Delta_f H_m^\circ(\text{g})$<br>/ kJ·mol <sup>-1</sup> | $S_{298.15\text{ K}}^\circ$<br>/ J·K <sup>-1</sup> ·mol <sup>-1</sup> | $\Delta_f S_m^\circ(\text{g})$<br>/ J·K <sup>-1</sup> ·mol <sup>-1</sup> | $\Delta_f G_m^\circ(\text{g})$<br>/ kJ·mol <sup>-1</sup> | $\chi_i$ |
|--------------------------------------------------------------------------------------------|--------------------------------------------------------------------------------------------|-----|----------------------------------------------------|----------------------------------------------------------|-----------------------------------------------------------------------|--------------------------------------------------------------------------|----------------------------------------------------------|----------|
| 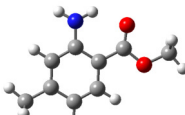<br>(1)  | <br>(2)  | (1) | -553.960190                                        | -322.7 ± 3.2                                             | 449.94                                                                | -621.4                                                                   | -137.4                                                   | 0.495    |
|                                                                                            |                                                                                            | (2) | -553.960191                                        | -322.7 ± 3.2                                             | 449.91                                                                | -621.4                                                                   | -137.4                                                   | 0.493    |
| <br>(3) | <br>(4) | (3) | -553.955878                                        | -311.4 ± 3.2                                             | 451.38                                                                | -620.0                                                                   | -126.6                                                   | 0.006    |
|                                                                                            |                                                                                            | (4) | -553.955877                                        | -311.4 ± 3.2                                             | 451.36                                                                | -620.0                                                                   | -126.5                                                   | 0.006    |

<sup>1</sup>Spheres color code: grey, C; red, O; blue, N; white, H.

<sup>2</sup> 1 a. u. (Hartree) corresponds to 2625.50 kJ·mol<sup>-1</sup>.

**Table S3.** Absolute standard enthalpies,  $H_{298.15\text{ K}}^\circ$ , and entropies,  $S_{298.15\text{ K}}^\circ$ , obtained by G3(MP2)//B3LYP composite method for MMA-5 and the corresponding derived gas-phase standard molar enthalpies,  $\Delta_f H_m^\circ(\text{g})$ , entropies,  $\Delta_f S_m^\circ(\text{g})$ , and Gibbs energy of formation,  $\Delta_f G_m^\circ(\text{g})$ , at  $T = 298.15\text{ K}$ , and the conformational composition,  $\chi_i$ .

| Conformations of MMA-5 <sup>1</sup> |         |     | $H_{298.15\text{ K}}^\circ$ <sup>2</sup><br>/ a.u. | $\Delta_f H_m^\circ(\text{g})$<br>/ kJ·mol <sup>-1</sup> | $S_{298.15\text{ K}}^\circ$<br>/ J·K <sup>-1</sup> ·mol <sup>-1</sup> | $\Delta_f S_m^\circ(\text{g})$<br>/ J·K <sup>-1</sup> ·mol <sup>-1</sup> | $\Delta_f G_m^\circ(\text{g})$<br>/ kJ·mol <sup>-1</sup> | $\chi_i$ |
|-------------------------------------|---------|-----|----------------------------------------------------|----------------------------------------------------------|-----------------------------------------------------------------------|--------------------------------------------------------------------------|----------------------------------------------------------|----------|
| <br>(1)                             | <br>(2) | (1) | -553.958644                                        | -314.1 ± 6.7                                             | 449.30                                                                | -622.1                                                                   | -128.6                                                   | 0.494    |
|                                     |         | (2) | -553.958643                                        | -314.1 ± 6.7                                             | 449.30                                                                | -622.1                                                                   | -128.6                                                   | 0.494    |
| <br>(3)                             | <br>(4) | (3) | -553.954551                                        | -303.3 ± 6.7                                             | 448.80                                                                | -622.6                                                                   | -117.7                                                   | 0.006    |
|                                     |         | (4) | -553.954551                                        | -303.3 ± 6.7                                             | 448.80                                                                | -622.6                                                                   | -117.7                                                   | 0.006    |

<sup>1</sup>Spheres color code: grey, C; red, O; blue, N; white, H.

<sup>2</sup> 1 a. u. (Hartree) corresponds to 2625.50 kJ·mol<sup>-1</sup>.

**Table S4.** Absolute standard enthalpies,  $H_{298.15\text{ K}}^\circ$ , and entropies,  $S_{298.15\text{ K}}^\circ$ , obtained by G3(MP2)//B3LYP composite method for MMA-6 and the corresponding derived gas-phase standard molar enthalpies,  $\Delta_f H_m^\circ(\text{g})$ , entropies,  $\Delta_f S_m^\circ(\text{g})$ , and Gibbs energy of formation,  $\Delta_f G_m^\circ(\text{g})$ , at  $T = 298.15\text{ K}$ , and the conformational composition,  $\chi_i$ .

| Conformations of MMA-6 <sup>1</sup> |         |     | $H_{298.15\text{ K}}^\circ$ <sup>2</sup><br>/ a.u. | $\Delta_f H_m^\circ(\text{g})$<br>/ kJ·mol <sup>-1</sup> | $S_{298.15\text{ K}}^\circ$<br>/ J·K <sup>-1</sup> ·mol <sup>-1</sup> | $\Delta_f S_m^\circ(\text{g})$<br>/ J·K <sup>-1</sup> ·mol <sup>-1</sup> | $\Delta_f G_m^\circ(\text{g})$<br>/ kJ·mol <sup>-1</sup> | $\chi_i$ <sup>7</sup> |
|-------------------------------------|---------|-----|----------------------------------------------------|----------------------------------------------------------|-----------------------------------------------------------------------|--------------------------------------------------------------------------|----------------------------------------------------------|-----------------------|
| <br>(1)                             | <br>(2) | (1) | -553.953032                                        | -303.9 ± 3.2                                             | 439.42                                                                | -631.9                                                                   | -115.5                                                   | 0.457                 |
|                                     |         | (2) | -553.953032                                        | -303.9 ± 3.2                                             | 439.41                                                                | -631.9                                                                   | -115.5                                                   | 0.457                 |
| <br>(3)                             | <br>(4) | (3) | -553.950919                                        | -298.4 ± 3.2                                             | 437.96                                                                | -633.4                                                                   | -109.6                                                   | 0.042                 |
|                                     |         | (4) | -553.950910                                        | -298.4 ± 3.2                                             | 438.38                                                                | -633.0                                                                   | -109.7                                                   | 0.044                 |

<sup>1</sup>Spheres color code: grey, C; red, O; blue, N; white, H.

<sup>2</sup> 1 a. u. (Hartree) corresponds to 2625.50 kJ·mol<sup>-1</sup>.

**Table S5.** G3(MP2)//B3LYP enthalpies with corresponding gas-phase standard ( $p^0 = 0.1$  MPa) molar enthalpies of formation, at  $T = 298.15$  K, for the atomic and molecular species.

| Atom     | Formula | $H_{298.15K}^{\circ}$ / a. u. ( $\chi_i$ ) <sup>1,2</sup> | $\Delta_f H_m^{\circ}(g)$ /kJ·mol <sup>-1</sup> |
|----------|---------|-----------------------------------------------------------|-------------------------------------------------|
| Carbon   | C       | -37.788425                                                | 716.67 [4]                                      |
| Hydrogen | H       | -0.499780                                                 | 218.00 [4]                                      |
| Oxygen   | O       | -74.989704                                                | 249.17 [4]                                      |
| Nitrogen | N       | -54.524582                                                | 472.68 [4]                                      |

  

| Compound                    | Formula                                        | $H_{298.15K}^{\circ}$ / a. u. ( $\chi_i$ ) <sup>a</sup>                                                                                                                                                                                        | $\Delta_f H_m^{\circ}(g)$ /kJ·mol <sup>-1</sup> |
|-----------------------------|------------------------------------------------|------------------------------------------------------------------------------------------------------------------------------------------------------------------------------------------------------------------------------------------------|-------------------------------------------------|
| Benzene                     | C <sub>6</sub> H <sub>6</sub>                  | -231.835164                                                                                                                                                                                                                                    | 82.6 ± 0.7 [5]                                  |
| Butane                      | C <sub>4</sub> H <sub>10</sub>                 | -158.120780                                                                                                                                                                                                                                    | -125.7 ± 0.6 [5]                                |
| Butyl acetate               | C <sub>6</sub> H <sub>12</sub> O <sub>2</sub>  | -385.715515 (0.39)<br>-385.715140 (0.17)<br>-385.715097 (0.11)<br>-385.715001 (0.09)<br>-385.714103 (0.05)<br>-385.714777 (0.05)<br>-385.714395 (0.05)<br>-385.713873 (0.02)<br>-385.713831 (0.02)<br>-385.713265 (0.02)<br>-385.713263 (0.02) | -485.3 ± 0.7 [5]                                |
| Ethane                      | C <sub>2</sub> H <sub>6</sub>                  | -79.651016                                                                                                                                                                                                                                     | -83.8 ± 0.3 [5]                                 |
| Ethyl acetate               | C <sub>4</sub> H <sub>8</sub> O <sub>2</sub>   | -307.245657 (0.71)<br>-307.245239 (0.29)                                                                                                                                                                                                       | -443.6 ± 0.5 [5]                                |
| Methane                     | CH <sub>4</sub>                                | -40.420547                                                                                                                                                                                                                                     | -74.4 ± 0.4 [5]                                 |
| Methyl acetate              | C <sub>3</sub> H <sub>6</sub> O <sub>2</sub>   | -268.006106                                                                                                                                                                                                                                    | -413.3 ± 0.7 [5]                                |
| Methyl anthranilate         | C <sub>8</sub> H <sub>9</sub> NO <sub>2</sub>  | -514.720048 (0.484)<br>-514.720042 (0.502)<br>-514.715856 (0.007)<br>-514.715850 (0.007)                                                                                                                                                       | -284.1 ± 3.0 [6]                                |
| Methyl benzoate             | C <sub>8</sub> H <sub>8</sub> O <sub>2</sub>   | -459.430197                                                                                                                                                                                                                                    | -273.45 ± 0.77 [7]                              |
| Methyl 3-methylanthranilate | C <sub>9</sub> H <sub>11</sub> NO <sub>2</sub> | -553.960367 (0.496)<br>-553.960366 (0.496)<br>-553.955693 (0.004)<br>-553.955693 (0.004)                                                                                                                                                       |                                                 |
| Methyl 4-methylanthranilate | C <sub>9</sub> H <sub>11</sub> NO <sub>2</sub> | -553.960190 (0.495)<br>-553.960191 (0.493)<br>-553.955878 (0.006)<br>-553.955877 (0.006)                                                                                                                                                       |                                                 |

.../...

**Table S5.** (continuation)

| Compound                    | Chemical Structure                             | $H_{298.15K}^{\circ}$ / a. u. ( $\chi_i$ ) <sup>1,2</sup>                                                                                                                                        | $\Delta_f H_m^{\circ}(g)$ /kJ·mol <sup>-1</sup> |
|-----------------------------|------------------------------------------------|--------------------------------------------------------------------------------------------------------------------------------------------------------------------------------------------------|-------------------------------------------------|
| Methyl 5-methylanthranilate | C <sub>9</sub> H <sub>11</sub> NO <sub>2</sub> | -553.958644 ( <b>0.494</b> )<br>-553.958643 ( <b>0.494</b> )<br>-553.954551 ( <b>0.006</b> )<br>-553.954555 ( <b>0.006</b> )<br><br>-553.953037 ( <b>0.457</b> )<br>-553.953037 ( <b>0.457</b> ) |                                                 |
| Methyl 6-methylanthranilate | C <sub>9</sub> H <sub>11</sub> NO <sub>2</sub> | -553.950919 ( <b>0.042</b> )<br>-553.950910 ( <b>0.044</b> )                                                                                                                                     | –                                               |
| Propane                     | C <sub>3</sub> H <sub>8</sub>                  | –118.885800                                                                                                                                                                                      | –104.7 ± 0.5 [5]                                |
| Propyl acetate              | C <sub>5</sub> H <sub>10</sub> O <sub>2</sub>  | -346.480526 ( <b>0.39</b> )<br>-346.480253 ( <b>0.31</b> )<br>-346.480105 ( <b>0.16</b> )<br>-346.480093 ( <b>0.14</b> )                                                                         | –464.8 [8]                                      |
| Toluene                     | C <sub>7</sub> H <sub>8</sub>                  | –271.074388                                                                                                                                                                                      | 50.5 ± 0.5 [5]                                  |
| <i>o</i> -Toluidine         | C <sub>7</sub> H <sub>9</sub> N <sub>2</sub>   | –326.360243                                                                                                                                                                                      | 53.2 ± 0.5 [9]                                  |
| <i>m</i> -Toluidine         | C <sub>7</sub> H <sub>9</sub> N <sub>2</sub>   | –326.359301                                                                                                                                                                                      | 53.4                                            |
| <i>p</i> -Toluidine         | C <sub>7</sub> H <sub>9</sub> N <sub>2</sub>   | –326.358419                                                                                                                                                                                      | 62.2 [10]                                       |

<sup>1</sup>  $\chi_i$  corresponds to the conformer composition.<sup>2</sup> 1 a. u. (Hartree) corresponds to 2625.50 kJ·mol<sup>-1</sup>.

## S2. Combustion Calorimetry

Tables S6 and S7 display the detailed combustion results for the MMA-3 and MMA-5 isomers.

The symbols presented in tables have the following meaning:

- $m(\text{CO}_2, \text{total})$ , mass of carbon dioxide;
- $m(\text{cpd})$ , mass of compound corrected for air buoyancy;
- $m(\text{cpd corrected})$ , mass of compound considering the % CO<sub>2</sub> recovery;
- $m(\text{fuse})$ , mass of fuse (cotton);
- $m(\text{Melinex}^{\circledR})$ , mass of Melinex, corrected for water content;
- $T_i$ , initial temperature increase;
- $T_f$ , final temperature increase;
- $\Delta T_{\text{ad}}$ , corrected temperature rise;
- $\varepsilon$ , energy equivalent for the contents in the final state;
- $\Delta m(\text{H}_2\text{O})$ , deviation in mass of water added to the calorimeter from 3116.6 g;
- $\Delta U(\text{IBP})$ , internal energy associated with the isothermal combustion reaction under actual bomb conditions;
- $\Delta U(\text{Melinex}^{\circledR})$ , energy of combustion of Melinex;
- $\Delta U(\text{fuse})$ , energy of combustion of the fuse (cotton);
- $\Delta U(\text{HNO}_3)$ , energy correction for nitric acid formation;
- $\Delta U(\text{ign})$ , electric energy for ignition;
- $\Delta U_{\Sigma}$ , standard state correction;
- $\Delta_c u^{\circ}$  (corrected), standard ( $p^{\circ} = 0.1$  MPa) massic energy of combustion for the compound, determined from the compound mass based on carbon dioxide recovery;
- % CO<sub>2</sub>, percentage of recovered carbon dioxide.

**Table S6** Combustion results and standard ( $p^\circ = 0.1$  MPa) massic energy of combustion, at  $T = 298.15$  K, for MMA-3.

| Experiment                                                                            | 1         | 2         | 3         | 4         | 5         | 6         |
|---------------------------------------------------------------------------------------|-----------|-----------|-----------|-----------|-----------|-----------|
| $m(\text{CO}_2, \text{total}) / \text{g}$                                             | 1.53843   | 1.51258   | 1.51736   | 1.55050   | 1.44468   | 1.53261   |
| $m(\text{cpd}) / \text{g}$                                                            | 0.57664   | 0.56755   | 0.56786   | 0.58147   | 0.57003   | 0.57026   |
| $m(\text{cpd corrected}) / \text{g}$                                                  | 0.57711   | 0.56797   | 0.56823   | 0.58131   | 0.57016   | 0.57015   |
| $m(\text{fuse}) / \text{g}$                                                           | 0.00226   | 0.00227   | 0.00211   | 0.00230   | 0.00217   | 0.00224   |
| $m(\text{Melinex}^\circ) / \text{g}$                                                  | 0.6593    | 0.06421   | 0.06613   | 0.06677   | 0.03234   | 0.07069   |
| $m(\text{carbon}) / \text{g}$                                                         | 0         | 0         | 0         | 0         | 0         | 0         |
| $T_i / \text{K}$                                                                      | 298.15007 | 298.15124 | 298.15115 | 298.15046 | 298.15084 | 298.14981 |
| $T_f / \text{K}$                                                                      | 299.35195 | 299.33516 | 299.33797 | 299.36168 | 299.29447 | 299.34700 |
| $\Delta T_{\text{ad}} / \text{K}$                                                     | 1.12689   | 1.10813   | 1.11156   | 1.13668   | 1.06616   | 1.12158   |
| $\varepsilon / (\text{J}\cdot\text{K}^{-1})$                                          | 17.10     | 17.06     | 17.07     | 17.11     | 17.01     | 17.09     |
| $\Delta m(\text{H}_2\text{O}) / \text{g}$                                             | 0         | -0.1      | 0         | 0         | 0         | 0         |
| $-\Delta U(\text{IBP}) / \text{J}$                                                    | 18051.76  | 17750.21  | 17805.93  | 18208.69  | 17078.51  | 17966.17  |
| $\Delta U(\text{carbon}) / \text{J}$                                                  | 0         | 0         | 0         | 0         | 0         | 0         |
| $-\Delta U(\text{Melinex}^\circ) / \text{J}$                                          | 1510.04   | 1470.52   | 1514.61   | 1529.23   | 740.63    | 1619.01   |
| $-\Delta U(\text{fuse}) / \text{J}$                                                   | 36.70     | 36.86     | 34.27     | 37.35     | 35.24     | 36.38     |
| $-\Delta U(\text{HNO}_3) / \text{J}$                                                  | 27.25     | 29.75     | 30.10     | 29.11     | 27.13     | 28.88     |
| $\Delta U(\text{ign}) / \text{J}$                                                     | 0.68      | 1.19      | 0.89      | 0.59      | 0.96      | 1.19      |
| $\Delta U_\Sigma / \text{J}$                                                          | 10.71     | 10.49     | 10.53     | 10.81     | 9.90      | 10.68     |
| $-\Delta_c u^\circ(\text{corrected}) / (\text{J}\cdot\text{g}^{-1})$                  | 28533.66  | 28527.19  | 28538.48  | 28559.96  | 28528.15  | 28538.49  |
| % $\text{CO}_2$                                                                       | 100.081   | 100.074   | 100.066   | 99.973    | 100.023   | 99.981    |
| $\langle -\Delta_c u^\circ \rangle = (28537.7 \pm 4.9)^1 \text{ J}\cdot\text{g}^{-1}$ |           |           |           |           |           |           |

<sup>1</sup> The uncertainty corresponds to the estimated standard deviation of the mean for six experiments.

**TABLE S7** Combustion results and standard ( $p^\circ = 0.1$  MPa) massic energy of combustion, at  $T = 298.15$  K, for MMA-5.

| Experiment                                                                                        | 1         | 2         | 3         | 4         | 5         | 6         |
|---------------------------------------------------------------------------------------------------|-----------|-----------|-----------|-----------|-----------|-----------|
| $m(\text{CO}_2, \text{total}) / \text{g}$                                                         | 1.53965   | 1.27253   | 1.71297   | 1.63147   | 1.38646   | 1.86482   |
| $m(\text{cpd}) / \text{g}$                                                                        | 0.64057   | 0.52934   | 0.71288   | 0.67925   | 0.57664   | 0.77687   |
| $m(\text{cpd corrected}) / \text{g}$                                                              | 0.64049   | 0.52922   | 0.71302   | 0.67893   | 0.57673   | 0.77628   |
| $m(\text{fuse}) / \text{g}$                                                                       | 0.00241   | 0.00222   | 0.00204   | 0.00220   | 0.00223   | 0.00215   |
| $T_i / \text{K}$                                                                                  | 298.15056 | 298.15035 | 298.15036 | 298.15356 | 298.14961 | 298.15069 |
| $T_f / \text{K}$                                                                                  | 299.36901 | 299.17828 | 299.49163 | 299.43772 | 299.25826 | 299.60399 |
| $\Delta T_{\text{ad}} / \text{K}$                                                                 | 1.14371   | 0.94545   | 1.27117   | 1.21239   | 1.02947   | 1.38397   |
| $\alpha / (\text{J} \cdot \text{K}^{-1})$                                                         | 17.42     | 17.12     | 17.63     | 17.53     | 17.24     | 17.80     |
| $\Delta m(\text{H}_2\text{O}) / \text{g}$                                                         | 0.2       | 0         | 0         | 0         | 0         | 0         |
| $-\Delta U(\text{IBP}) / \text{J}$                                                                | 18322.09  | 15144.66  | 20363.24  | 19421.49  | 16490.74  | 22170.55  |
| $-\Delta U(\text{fuse}) / \text{J}$                                                               | 39.14     | 36.05     | 33.13     | 35.73     | 36.22     | 34.92     |
| $-\Delta U(\text{HNO}_3) / \text{J}$                                                              | 31.69     | 25.29     | 32.51     | 32.45     | 30.69     | 36.09     |
| $\Delta U(\text{ign}) / \text{J}$                                                                 | 1.12      | 1.18      | 1.20      | 1.16      | 1.20      | 1.20      |
| $\Delta U_{\Sigma} / \text{J}$                                                                    | 10.49     | 8.52      | 11.82     | 11.22     | 9.33      | 13.01     |
| $-\Delta_c u^\circ(\text{corrected}) / (\text{J} \cdot \text{g}^{-1})$                            | 28479.40  | 28484.94  | 28450.51  | 28489.08  | 28461.33  | 28451.76  |
| % $\text{CO}_2$                                                                                   | 99.988    | 99.977    | 100.020   | 99.953    | 100.014   | 99.921    |
| $\langle -\Delta_c u^\circ \rangle = (28469.5 \pm 7.0)^1 \text{ J} \cdot \text{g}^{-1} \text{ c}$ |           |           |           |           |           |           |

<sup>1</sup>The uncertainty corresponds to the estimated standard deviation of the mean for six experiments.



### A3. Vacuum drop microcalorimetric technique

Tables S8 and S9 show the detailed results obtained from Calvet microcalorimetry for the vaporization process of MMA-3 and the sublimation process of MMA-5.

The symbols presented in tables have the following meaning:

- $T_{\text{Calvet}}$ , temperature of the hot reaction vessel;
- $m(\text{sct})$  mass of the sample capillary tube;
- $m(\text{rct})$  mass of the reference capillary tube;
- $m(\text{cpd})$ , mass of the compound;
- $\Delta H(\text{blank})$ , blank heat capacity corrections for the glass capillary tubes;
- $\Delta H(\text{total})$ , total enthalpy calculated from the area of the enthalpic peak obtained in the experiment;
- $\Delta H(\text{corr})$ , enthalpy change corrected taking into account the blank experiments;
- $\Delta_{\text{l}, 298.15\text{K}}^{\text{g}, T_{\text{Calvet}}} H_{\text{m}}^{\circ} (\text{exp})$ , enthalpy of vaporization from 298.15 K to temperature of the hot reaction vessel;
- $\Delta_{\text{cr}, 298.15\text{K}}^{\text{g}, T_{\text{Calvet}}} H_{\text{m}}^{\circ} (\text{exp})$ , enthalpy of sublimation from 298.15 K to temperature of the hot reaction vessel;
- $\Delta_{298.15\text{K}}^{T_{\text{Calvet}}} H_{\text{m}}^{\circ} (\text{g})$ , enthalpy change in the gas-phase phase from 298.15 K to the temperature of the hot reaction vessel;
- $\Delta_{\text{l}}^{\text{g}} H_{\text{m}}^{\circ} (298.15\text{ K})$ , enthalpy of vaporization at 298.15 K of the compound;
- $\Delta_{\text{cr}}^{\text{g}} H_{\text{m}}^{\circ} (298.15\text{ K})$ , enthalpy of sublimation at 298.15 K of the compound.

**TABLE S8** Calvet microcalorimetry results for the process of vaporization of MMA-3.

| Experiment                                                                                                                          | 1       | 2       | 3       | 4       | 5       | 6       |
|-------------------------------------------------------------------------------------------------------------------------------------|---------|---------|---------|---------|---------|---------|
| $T_{\text{Calvet}} / \text{K}$                                                                                                      | 345.85  | 345.58  | 345.70  | 345.46  | 345.58  | 345.72  |
| $m(\text{sct}) / \text{mg}$                                                                                                         | 19.4729 | 19.5920 | 20.2518 | 19.4882 | 20.5738 | 20.0952 |
| $m(\text{rct}) / \text{mg}$                                                                                                         | 19.5142 | 19.5986 | 20.3113 | 19.5908 | 20.6461 | 20.1245 |
| $m(\text{cpd}) / \text{mg}$                                                                                                         | 6.449   | 5.263   | 5.286   | 5.852   | 6.653   | 5.680   |
| $\Delta H(\text{blank}) / \text{mJ}$                                                                                                | 32.531  | 31.522  | 32.869  | 34.758  | 33.057  | 31.969  |
| $\Delta H(\text{total}) / \text{J}$                                                                                                 | 3.034   | 2.463   | 2.489   | 2.763   | 3.117   | 2.669   |
| $\Delta H(\text{corr}) / \text{J}$                                                                                                  | 3.067   | 2.495   | 2.522   | 2.798   | 3.150   | 2.701   |
| $\Delta_{\text{l}, 298.15\text{K}}^{\text{g}, T_{\text{Calvet}}} H_{\text{m}}^{\circ} (\text{exp}) / \text{kJ}\cdot\text{mol}^{-1}$ | 80.83   | 80.57   | 81.11   | 81.26   | 80.48   | 80.81   |
| $\Delta_{298.15\text{K}}^{T_{\text{Calvet}}} H_{\text{m}}^{\circ} (\text{g}) / \text{kJ}\cdot\text{mol}^{-1}$                       | 10.037  | 9.977   | 10.004  | 9.950   | 9.977   | 10.008  |
| $\Delta_{\text{l}}^{\text{g}} H_{\text{m}}^{\circ} (298.15\text{ K}) / \text{kJ}\cdot\text{mol}^{-1}$                               | 70.79   | 70.59   | 71.10   | 71.31   | 70.50   | 70.80   |
| $\Delta_{\text{l}}^{\text{g}} H_{\text{m}}^{\circ} (298.15\text{ K}) = 70.8 \pm 2.0^{\text{†}} \text{ kJ}\cdot\text{mol}^{-1}$      |         |         |         |         |         |         |

<sup>†</sup>The quoted uncertainty corresponds to the expanded uncertainty determined from the combined standard uncertainty (which include the contribution of calibration with decane) and the coverage factor  $k = 2.16$  (for an effective degrees of freedom of 13, calculated from Welch-Satterthwaite formula, and a 0.95 level of confidence) [11].

**TABLE S9** Calvet microcalorimetry results for the process of sublimation of MMA-5.

| Experiment                                                                                                                       | 1       | 2       | 3       | 4       | 5       | 6       |
|----------------------------------------------------------------------------------------------------------------------------------|---------|---------|---------|---------|---------|---------|
| $T_{\text{Calvet}} / \text{K}$                                                                                                   | 333.52  | 333.52  | 333.65  | 333.52  | 333.56  | 333.65  |
| $m(\text{sct}) / \text{mg}$                                                                                                      | 21.0344 | 22.0145 | 22.1685 | 21.8166 | 21.5491 | 20.2036 |
| $m(\text{rct}) / \text{mg}$                                                                                                      | 21.0983 | 22.0612 | 22.1809 | 21.9153 | 21.5831 | 20.3106 |
| $m(\text{cpd}) / \text{mg}$                                                                                                      | 4.360   | 3.610   | 5.565   | 3.356   | 3.766   | 3.627   |
| $\Delta H(\text{blank}) / \text{mJ}$                                                                                             | 30.140  | 29.227  | 28.318  | 30.616  | 29.149  | 31.652  |
| $\Delta H(\text{total}) / \text{J}$                                                                                              | 2.335   | 2.024   | 3.120   | 1.826   | 2.059   | 2.007   |
| $\Delta H(\text{corr}) / \text{J}$                                                                                               | 2.365   | 2.053   | 3.148   | 1.856   | 2.088   | 2.039   |
| $\Delta_{\text{cr}}^{\text{g}, T_{\text{Calvet}}} H_{\text{m}}^{\circ} (\text{exp}) / \text{kJ}\cdot\text{mol}^{-1}$             | 94.66   | 99.26   | 98.72   | 96.53   | 96.76   | 98.10   |
| $\Delta_{298.15 \text{ K}}^{T_{\text{Calvet}}} H_{\text{m}}^{\circ} (\text{g}) / \text{kJ}\cdot\text{mol}^{-1}$                  | 7.38    | 7.38    | 7.41    | 7.38    | 7.39    | 7.41    |
| $\Delta_{\text{cr}}^{\text{g}} H_{\text{m}}^{\circ} (298.15 \text{ K}) / \text{kJ}\cdot\text{mol}^{-1}$                          | 87.28   | 91.89   | 91.31   | 89.15   | 89.38   | 90.69   |
| $\Delta_{\text{cr}}^{\text{g}} H_{\text{m}}^{\circ} (298.15 \text{ K}) = 89.9 \pm 2.0^{\text{c}} \text{ kJ}\cdot\text{mol}^{-1}$ |         |         |         |         |         |         |

<sup>c</sup>The standard uncertainty corresponds to the expanded uncertainty determined from the combined standard uncertainty (which include the contribution of calibration with naphthalene) and the coverage factor  $k = 2.23$  (for an effective degrees of freedom of 11, calculated from Welch-Satterthwaite formula, and a 0.95 level of confidence) [11].

**Table S10** Standard ( $p^{\circ} = 0.1 \text{ MPa}$ ) molar heat capacities in the gaseous phase for MMA-3 and MMA-5, obtained from statistical thermodynamics using the vibrational frequencies calculated at the B3LYP/6-31G(*d*) level of theory (scaled by a factor of  $0.960 \pm 0.022$ ) [12].

| $T / \text{K}$ | $C_p^{\circ}(\text{g}) / \text{J}\cdot\text{K}^{-1}\cdot\text{mol}^{-1}$ |        |
|----------------|--------------------------------------------------------------------------|--------|
|                | MMA-3                                                                    | MMA-5  |
| 200.00         | 143.42                                                                   | 146.00 |
| 250.00         | 171.18                                                                   | 173.17 |
| 298.15         | 197.62                                                                   | 199.18 |
| 300.00         | 198.63                                                                   | 200.17 |
| 350.00         | 225.19                                                                   | 226.40 |
| 400.00         | 250.25                                                                   | 251.21 |
| 450.00         | 273.40                                                                   | 274.17 |
| 500.00         | 294.50                                                                   | 295.13 |
| 550.00         | 313.61                                                                   | 314.13 |
| 600.00         | 330.90                                                                   | 331.33 |

Polynomial functions were obtained for MMA-3 and MMA-5 from the use of the tabulated values. Mathematical expressions resulted from these and are present in eqs. S1 and S2.

$$C_p^\circ (\text{MMA-3, g}) / (\text{J}\cdot\text{K}^{-1}\cdot\text{mol}^{-1}) = -3.65641 \times 10^{-7} (\text{T} / \text{K})^3 + 1.13865 \times 10^{-4} (\text{T} / \text{K})^2 + 5.67683 \times 10^{-1} (\text{T} / \text{K}) + 28.0733 \quad (r^2 = 0.9999) \quad (\text{S1})$$

$$C_p^\circ (\text{MMA-5, g}) / (\text{J}\cdot\text{K}^{-1}\cdot\text{mol}^{-1}) = -3.92751 \times 10^{-7} (\text{T} / \text{K})^3 + 1.60091 \times 10^{-4} (\text{T} / \text{K})^2 + 5.39425 \times 10^{-1} (\text{T} / \text{K}) + 34.6683 \quad (r^2 = 0.9999) \quad (\text{S2})$$

#### S4. Knudsen Mass-Loss Effusion Method

The results for the sublimation experiments obtained for MMA-5 are given in the Table S11. The symbols presented have the following meaning:

- $T$  is the selected temperature of the aluminium block;
- $t$  is the effusion period;
- $m$  is the mass effused and  $p$  is the vapor pressure.
- the subscripts S, M and L correspond to the small, medium and large effusion orifices respectively.

The areas,  $A_0$ , for each orifice are:  $A_0(\text{S1,S2,S3}) = (0.636 \pm 0.004) \text{ mm}^2$ ,  $A_0(\text{M4,M5,M6}) = (0.785 \pm 0.004) \text{ mm}^2$ , and  $A_0(\text{L7,L8,L9}) = (0.985 \pm 0.004) \text{ mm}^2$ ;

The Clausing factors,  $\omega$ , for each orifice are:  $\omega(\text{S1,S2,S3}) = 0.986$ ,  $\omega(\text{M4,M5,M6}) = 0.988$ , and  $\omega(\text{L7,L8,L9}) = 0.989$ .

**TABLE S11** Knudsen mass-loss effusion results for MMA-5 at different orifices areas.

| $T/\text{K}^1$ | $t/\text{s}$ | Cells    | $m/\text{mg}$ |       |       | $p/\text{Pa}^2$ |        |        |
|----------------|--------------|----------|---------------|-------|-------|-----------------|--------|--------|
|                |              |          | $m_S$         | $m_M$ | $m_L$ | $p_S$           | $p_M$  | $p_L$  |
| 293.40         | 30063        | S3-M6-L9 | 9.64          | 11.68 | 14.97 | 0.1557          | 0.1526 | 0.1557 |
| 294.28         | 30063        | S2-M5-L8 | 11.01         | 13.24 | 16.75 | 0.1781          | 0.1732 | 0.1745 |
| 295.80         | 22550        | S2-M5-L8 | 9.85          | 11.91 | 15.05 | 0.2129          | 0.2083 | 0.2095 |
| 297.79         | 18839        | S2-M5-L8 | 10.61         | 12.85 | 16.22 | 0.2754          | 0.2698 | 0.2712 |
| 298.80         | 28879        | S2-M5-L8 | 18.68         | 22.47 | 28.19 | 0.3169          | 0.3083 | 0.3080 |
| 300.12         | 28879        | S1-M4-L7 | 22.35         | 27.15 | 33.60 | 0.3800          | 0.3734 | 0.3679 |
| 301.61         | 11915        | S1-M4-L7 | 10.84         | 13.14 | 16.47 | 0.4478          | 0.4391 | 0.4382 |
| 303.29         | 11076        | S2-M5-L8 | 12.31         | 14.67 | 18.47 | 0.5486          | 0.5288 | 0.5301 |
| 304.61         | 11076        | S1-M4-L7 | 14.66         | 17.63 | 22.00 | 0.6547          | 0.6369 | 0.6327 |
| 306.26         | 11915        | S2-M5-L8 | 18.71         | 22.40 | 28.22 | 0.7789          | 0.7543 | 0.7565 |
| 307.76         | 10779        | S2-M5-L8 | 20.39         | 24.63 | 30.73 | 0.9405          | 0.9190 | 0.9129 |
| 309.09         | 18839        | S1-M4-L7 | 41.55         | 50.67 | 63.28 | 1.0990          | 1.0841 | 1.0779 |

<sup>1</sup>The standard uncertainty of the measured temperature is  $\pm (1 \cdot 10^{-2}) \text{ K}$ ;

<sup>2</sup>The standard uncertainty is  $\pm (3 \cdot 10^{-2}) \text{ Pa}$ .

The standard ( $p^\circ = 0.1$  MPa) molar enthalpy of sublimation, at the mean temperature of the experimental range,  $\Delta_{\text{cr}}^g H_m^\circ(\langle T \rangle)$ , was calculated through the integrated form of the Clausius–Clapeyron equation,  $\ln(p/\text{Pa}) = a - b \cdot (K/T)$ , where  $a$  is a constant and  $b = \Delta_{\text{cr}}^g H_m^\circ(\langle T \rangle)/R$  ( $R = 8.3144598 \text{ J}\cdot\text{K}^{-1}\cdot\text{mol}^{-1}$ ), and the standard molar entropy of sublimation at the equilibrium pressure and mean temperature,  $\Delta_{\text{cr}}^g S_m(\langle T \rangle, p(\langle T \rangle))$ , calculated by eq. A3.

$$\Delta_{\text{cr}}^g S_m(\langle T \rangle, p(\langle T \rangle)) / \text{J}\cdot\text{K}^{-1}\cdot\text{mol}^{-1} = \Delta_{\text{cr}}^g H_m^\circ(\langle T \rangle) / \langle T \rangle \quad (\text{S3})$$

The values of the standard molar enthalpy, entropy and Gibbs energy of sublimation, at  $T = 298.15$  K, were calculated using eqs. S4 to S6, respectively. The value of the difference in standard molar heat capacity at constant pressure between the gaseous and the crystalline phase used for MMA-5 was,  $\Delta_{\text{cr}}^g C_{p,m}^\circ = -36.0 \text{ J}\cdot\text{K}^{-1}\cdot\text{mol}^{-1}$ . This value was calculated through eq. S7 derived by Monte et al. [13] as a rearrangement of eq. A8 suggested by Chickos and collaborators [14], using the respective value of the standard molar heat capacity at constant pressure in the gaseous phase at  $T = 298.15$  K, derived from statistical thermodynamics using the vibrational frequencies calculated at the B3LYP/6-31G(d) level of theory, scaled by a factor of  $0.960 \pm 0.022$  [12], reported in Table S10.

$$\Delta_{\text{cr}}^g H_m^\circ(298.15\text{K}) / \text{kJ}\cdot\text{mol}^{-1} = \Delta_{\text{cr}}^g H_m^\circ(\langle T \rangle) - \Delta_{\text{cr}}^g C_{p,m}^\circ(\langle T \rangle - 298.15) \quad (\text{S4})$$

$$\Delta_{\text{cr}}^g S_m^\circ(298.15\text{K}) / \text{J}\cdot\text{K}^{-1}\cdot\text{mol}^{-1} = \Delta_{\text{cr}}^g S_m^\circ(\langle T \rangle, p(\langle T \rangle)) + R \ln[p(\langle T \rangle)/p^\circ] + \Delta_{\text{cr}}^g C_{p,m}^\circ \ln(298.15/\langle T \rangle) \quad (\text{S5})$$

$$\Delta_{\text{cr}}^g G_m^\circ(298.15\text{K}) / \text{kJ}\cdot\text{mol}^{-1} = \Delta_{\text{cr}}^g H_m^\circ(298.15) - 298.15 \cdot \Delta_{\text{cr}}^g S_m^\circ(298.15) \quad (\text{S6})$$

$$\Delta_{\text{cr}}^g C_{p,m}^\circ / \text{J} \cdot \text{K}^{-1} \cdot \text{mol}^{-1} = -\{0.9 + 0.176 C_{p,m}^\circ(g)\} \quad (\text{S7})$$

$$\Delta_{\text{cr}}^g C_{p,m}^\circ / \text{J} \cdot \text{K}^{-1} \cdot \text{mol}^{-1} = -\{0.75 + 0.15 C_{p,m}^\circ(cr)\} \quad (\text{S8})$$

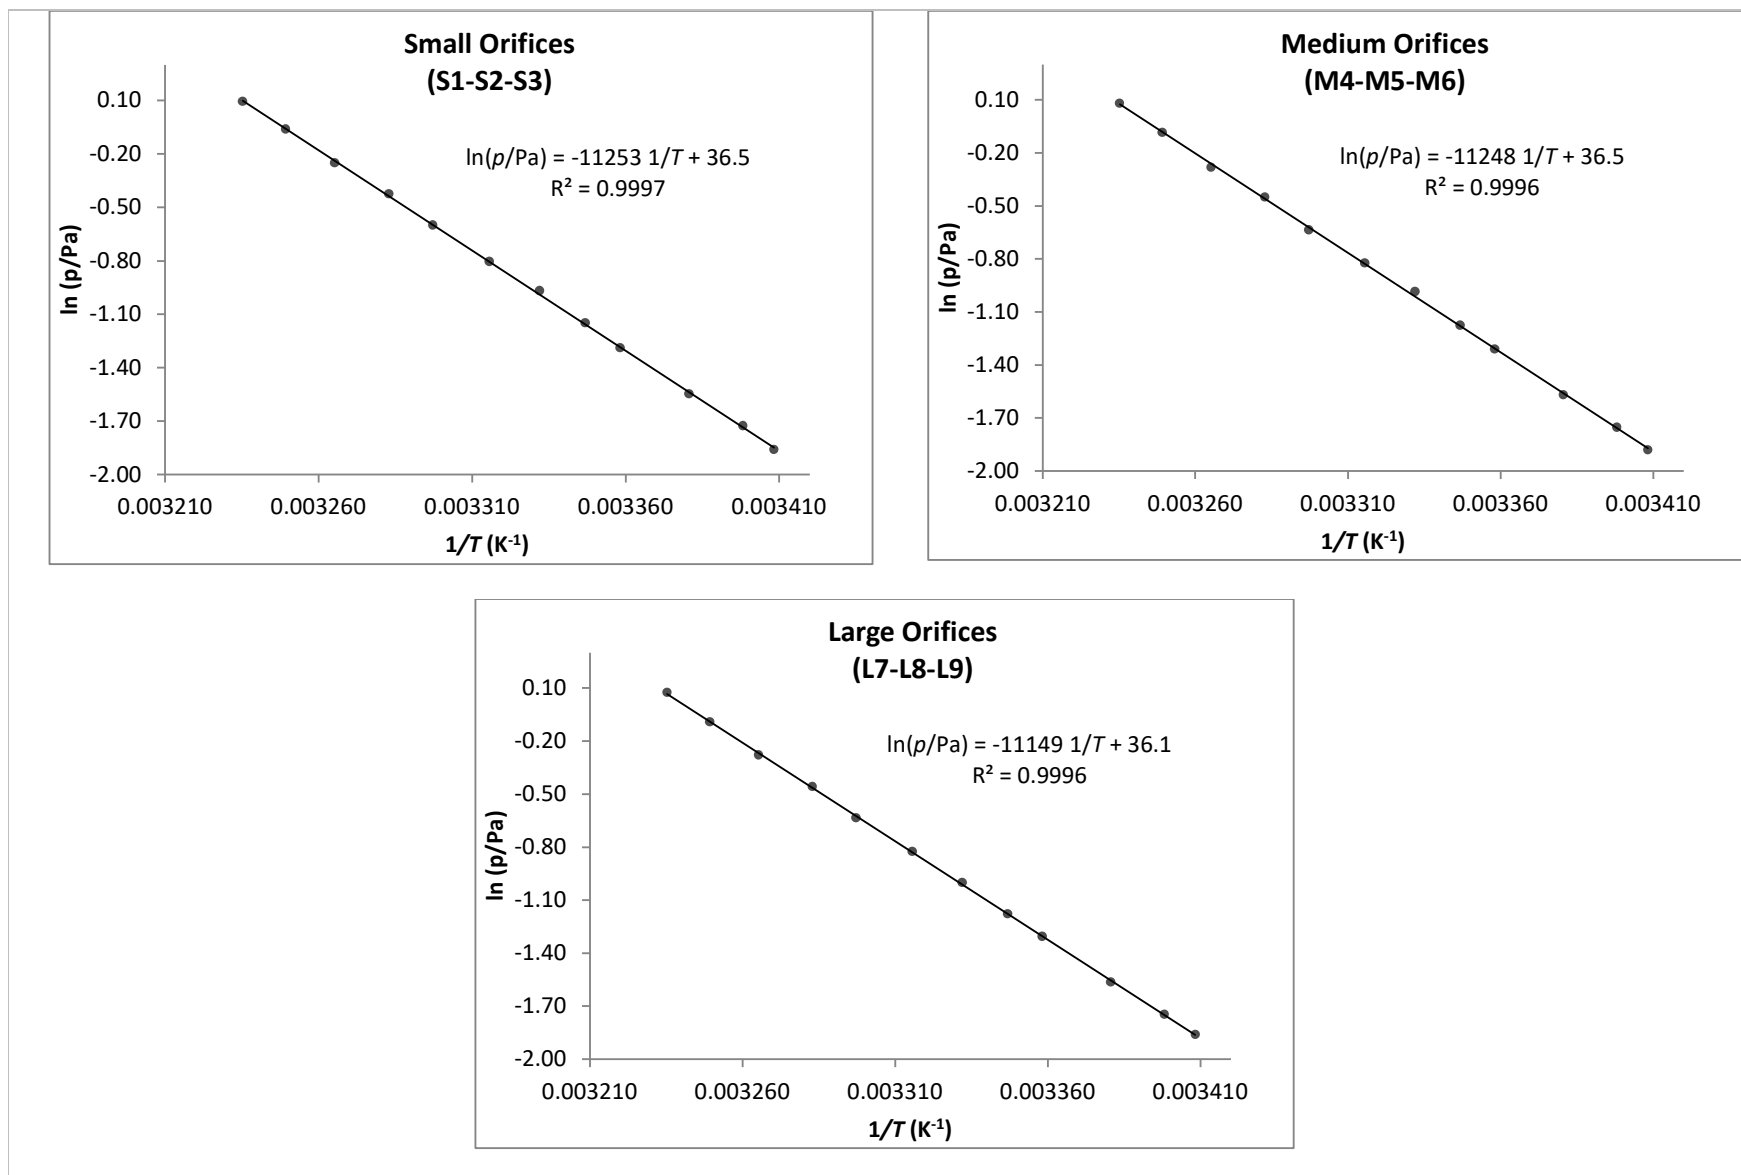

**Figure S1.** Plots of  $\ln(p/\text{Pa})$  against  $1/T$  for small, medium and large orifices obtained by the mass-loss Knudsen effusion experiments for MMA-5.

## S5. Differential Scanning Calorimetry

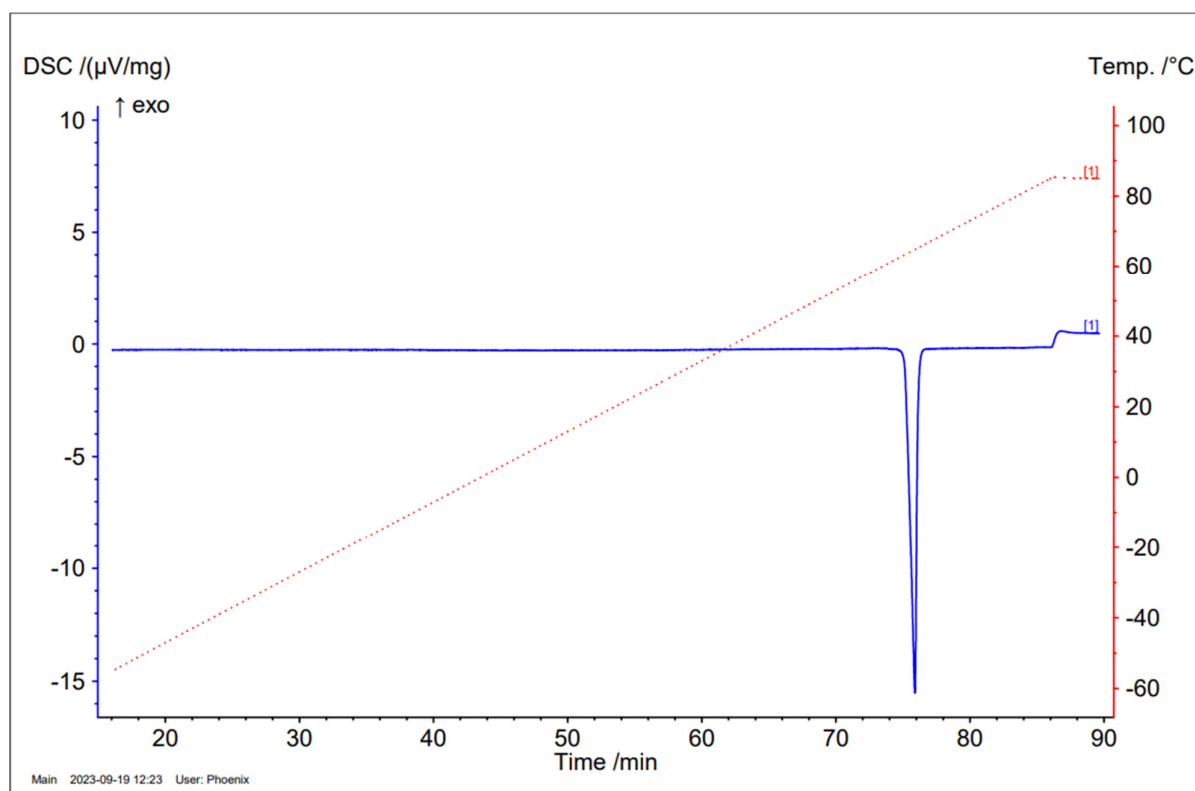

Figure S2. DSC curve obtained for MMA-5

## References

1. Gaussian 09, Revision A.02, Frisch, M.J.; Trucks, G.W.; Schlegel, H.B.; Scuseria, G.E.; Robb, M.A.; Cheeseman, J.R.; Scalmani, G.; Barone, V.; Petersson, G.A.; Nakatsuji, H.; Li, X.; Caricato, M.; Marenich, A.; Bloino, J.; Janesko, B.G.; Gomperts, R.; Mennucci, B.; Hratchian, H.P.; Ortiz, J.V.; Izmaylov, A.F.; Sonnenberg, J.L.; Williams-Young, D.; Ding, F.; Lipparini, F.; Egidi, F.; Goings, J.; Peng, B.; Petrone, A.; Henderson, T.; Ranasinghe, D.; Zakrzewski, V.G.; Gao, J.; Rega, N.; Zheng, G.; Liang, W.; Hada, M.; Ehara, M.; Toyota, K.; Fukuda, R.; Hasegawa, J.; Ishida, M.; Nakajima, T.; Honda, Y.; Kitao, O.; Nakai, H.; Vreven, T.; Throssell, K.; Montgomery Jr., J.A.; Peralta, J.E.; Ogliaro, F.; Bearpark, M.; Heyd, J.J.; Brothers, E.; Kudin, K.N.; Staroverov, V.N.; Keith, T.; Kobayashi, R.; Normand, J.; Raghavachari, K.; Rendell, A.; Burant, J.C.; Iyengar, S.S.; Tomasi, J.; Cossi, M.; Millam, J.M.; Klene, M.; Adamo, C.; Cammi, R.; Ochterski, J.W.; Martin, R.L.; Morokuma, K.; Farkas, O.; Foresman, J.B.; Fox, D.J.; Gaussian, Inc., Wallingford CT, 2016.
2. Baboul, A.G.; Curtiss, L.A.; Redfern, P.C.; Raghavachari, K.; Gaussian-3 theory using density functional geometries and zero-point energies. *J. Chem. Phys.* **1999**, *110*, 7650-7657.
3. Merrick, P.; Moran, D.; Radom, L. An evaluation of harmonic vibrational frequency scale factor. *J. Phys. Chem. A* **2007**, *111*, 11683-11700.
4. Chase Jr. M.W., NIST-Janaf Thermochemical Tables. *J Phys Chem Ref Data* (1998) Monograph 9 (part I and II), 1-1951. Available online: <https://janaf.nist.gov/> Accessed on 01 may 2021).
5. Pedley, J.B. *Thermochemical Data and Structures of Organic Compounds Thermodynamics*, Research Center, College Station, Texas, 1994.
6. Freitas, V.L.S.; Silva, C.A.O.; Ribeiro da Silva, M.D.M.C.; Thermochemical study of anthranilate derivatives: Effect of the size of the alkyl substituent. *J. Chem. Thermodyn.* **2021**, *158*, 106441.
7. Steele, W.V.; Chirico, R.D.; Cowell, A.B.; Knipmeyer, S.E.; Nguyen, A. Thermodynamic properties and ideal-gas enthalpies of formation for methyl benzoate, ethyl benzoate, (R)-(+)-limonene, *tert*-amyl methyl ether, *trans*-crotonaldehyde, and diethylene glycol. *J. Chem. Eng. Data* **2002**, *47*, 667-688.
8. Albahri, T.A.; Aljasm, A.F. SGC method for predicting the standard enthalpy of formation of pure compounds from their molecular structures. *Thermochim. Acta* **2013**, *415*, 46-60.

9. Steele, V.W.; Chirico, R.D.; Nguyen, A.; Knipmeyer, S.E. The thermodynamic properties of 2-methylaniline and trans-(*r,S*)-decahydroquinoline. *J. Chem. Thermodyn.* **1994**, *26*, 515-544.
10. Draeger, J.A. Chemical thermodynamic properties of molecules that undergo inversion. II The methylanilines, *J. Chem. Thermodyn.* **1984**, *16*, 1067-1073..
11. Taylor, B.N.; Kuyatt, C.E. *Guidelines for evaluating and expressing the uncertainty of NIST measurement results*. NIST Technical Note 1297, 1994 Edition.
12. NIST Computational Chemistry Comparison and Benchmark Database, NIST Standard Reference Database Number 101, Release 16a, August 2013, Editor: Russell D. Johnson III. <https://cccbdb.nist.gov/vibscalex.asp>. Accessed 5 July 2023.
13. Monte, M.J.S.; Almeida, A.R.R.P.; Matos, M.A.R. Thermodynamic study on the sublimation of five aminomethoxybenzoic acids. *J. Chem. Eng. Data* **2010**, *55*, 419-423.
14. Chickos, J.S.; Hosseini, S.; Hesse, D.G.; Liebman, J.F. Heat capacity corrections to a standard state: a comparison of new and some literature methods for organic liquids and solids, *Struct. Chem.* **1993**, *4*, 271-278.
